# Supplementary material for: Safety of G2-S16 Polyanionic Carbosilane Dendrimer as Possible HIV-1 Vaginal Microbicide
Source: MDPI journal article supplement (doi:10.3390/ijms23052565), 2022-02-25
Supplement: s1 [file s1]

## SUPPLEMENTARY INFORMATION

**Table S1. Effect of daily intravenous treatment with G2-S16 dendrimer for 7 consecutive days. on CD1 mice hemogram.** CD1 mice were treated with daily intravenous applications of either PBS or G2-S16 dendrimer (1 and 2.5 mg/Kg) for 7 consecutive days as indicated in Methods. Then, blood was drawn and the indicated parameters of the hemogram were determined. Data represent means  $\pm$  s.e.m. of 3 (PBS) or 5 (G2-S16, 1 and 2.5 mg/mL) mice. <sup>a</sup>  $p < 0.05$  as compared with PBS-treated animals.

| Parameter                        |                    |                               |                   |
|----------------------------------|--------------------|-------------------------------|-------------------|
|                                  | PBS                | 1 mg/kg                       | 2.5 mg/kg         |
| RBC ( $10^6/\mu\text{L}$ )       | 8.34 $\pm$ 0.49    | 6.99 $\pm$ 2.71               | 8.82 $\pm$ 2.94   |
| Haematocrit (%)                  | 45.77 $\pm$ 3.3    | 51.15 $\pm$ 4.56              | 46.05 $\pm$ 15.36 |
| Haemoglobin( g/dL)               | 14.40 $\pm$ 0.75   | 15.40 $\pm$ 2.1               | 14.87 $\pm$ 4.95  |
| MCV (fL)                         | 54.73 $\pm$ 0.78   | 50.77 $\pm$ 1.3               | 52.2 $\pm$ 17.40  |
| MCH (pg)                         | 17.35 $\pm$ 0.12   | 15.78 $\pm$ 0.95              | 16.85 $\pm$ 5.62  |
| MCHC (g/dL)                      | 31.53 $\pm$ 0.67   | 31.13 $\pm$ 1.83              | 32.25 $\pm$ 10.75 |
| RDW (%)                          | 21.03 $\pm$ 0.38   | 19.73 $\pm$ 2.43              | 22.05 $\pm$ 7.63  |
| WBC ( $10^3/\mu\text{L}$ )       | 2.06 $\pm$ 0.50    | 1.55 $\pm$ 0.64               | 3.18 $\pm$ 1.06   |
| Platelets ( $10^3/\mu\text{L}$ ) | 179.67 $\pm$ 94.17 | 464 $\pm$ 102.71 <sup>a</sup> | 215.5 $\pm$ 76.49 |
| PDW (fL)                         | 10.30 $\pm$ 3.43   | 8.53 $\pm$ 0.23               | 10.20 $\pm$ 3.4   |
| MPV (fL)                         | 8.10 $\pm$ 0.21    | 7.5 $\pm$ 0.40                | 9.03 $\pm$ 3.04   |
| Platelecrit (%)                  | 0.14 $\pm$ 0.07    | 0.35 $\pm$ 0.08 <sup>a</sup>  | 0.20 $\pm$ 0.08   |

RBC, red blood cells; MCV, mean corpuscular volume; MCH, mean corpuscular hemoglobin; MCHC, mean corpuscular hemoglobin concentration; RCDW, red cell distribution wide; WBC, white blood cells, PDW, platelet distribution wide; MPV, mean platelet volume.

**Table S2. Effect of daily intravenous treatment with G2-S16 dendrimer for 7 consecutive days. on CD1 mice plasma biochemical parameters.** CD1 mice were treated with daily i.v. applications of either PBS or G2-S16 dendrimer (1 and 2.5 mg/Kg) for 7 consecutive days as indicated in Methods. Then, blood was drawn and the indicated plasma biochemical parameters were determined. Data represent means + s.e.m. of 3 (PBS) or 5 (G2-S16, 1 and 2.5 mg/mL) mice. a p<0.05 as compared with PBS-treated animals.

| Parameter                      |                 |                          |                            |
|--------------------------------|-----------------|--------------------------|----------------------------|
|                                | <b>PBS</b>      | <b>1 mg/kg</b>           | <b>2.5 mg/kg</b>           |
| <b>Glucose (mg/dL)</b>         | 57.33 ± 11.1    | 74.33 ± 6.25             | 70.33 ± 12.85              |
| <b>Creatinine (mg/dL)</b>      | 0.15 ± 0.05     | 0.10 ± 0.03              | 0.10 ± 0.03                |
| <b>Urea (mg/dL)</b>            | 21 ± 7.02       | 19.33 ± 1.26             | 18.33 ± 2.08               |
| <b>Phosphorus (mg/dL)</b>      | 5.8 ± 1.95      | 5.93 ± 0.77              | 7.33 ± 0.63                |
| <b>Lipase (U/L)</b>            | 852.00 ± 284.07 | 812.67 ± 43.07           | 869.33 ± 15.18             |
| <b>ALT (U/L)</b>               | 165.2 ± 58.5    | 81 ± 3.04 <sup>a</sup>   | 92.67 ± 12.25 <sup>a</sup> |
| <b>ALKP (U/L)</b>              | 81.33 ± 39.54   | 81.67 ± 4.54             | 68.67 ± 12.58              |
| <b>Bilirubin Total (mg/dL)</b> | 1.65 ± 0.55     | 0.73 ± 0.08 <sup>a</sup> | 0.60 ± 0.09 <sup>a</sup>   |
| <b>Cholesterol (mg/dL)</b>     | 107.50 ± 36.25  | 122.67 ± 4.75            | 85.67 ± 5.13               |
| <b>Protein Total (g/dL)</b>    | 6.67 ± 0.38     | 6.1 ± 0.36               | 6.5 ± 0.1                  |
| <b>Albumin (g/dL)</b>          | 3.40 ± 0.12     | 3.13 ± 0.13              | 3.03 ± 0.06                |
| <b>Globulin (g/dL)</b>         | 3.27 ± 0.32     | 2.97 ± 0.46              | 3.5 ± 0.09                 |
| <b>Alb:Glob Ratio</b>          | 1.03 ± 0.09     | 1.2 ± 0.3                | 0.9 ± 0.05                 |

ALT, alanine aminotransferase; ALKP, alkaline phosphatase.
